# Supplementary material
Source: PubMed Central journal article supplement (PMC400480)
Supplement: molcellb_24_10_4329__1.pdf [file molcellb_24_10_4329__1.pdf]

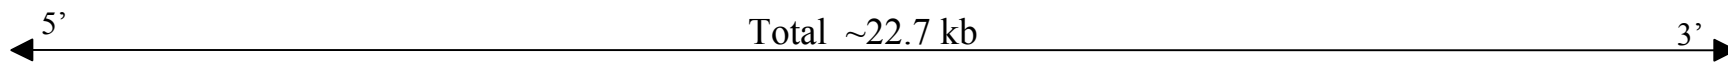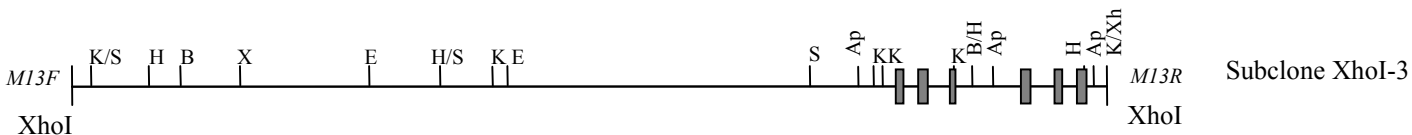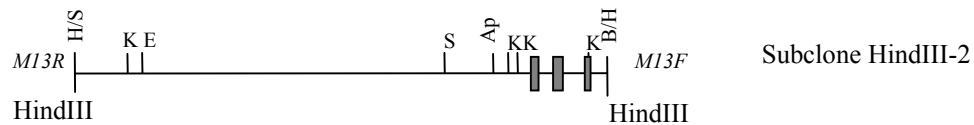

| Exon | mouse cDNA n.t. |
|------|-----------------|
| 1    | 1- 91           |
| 2    | 92-157          |
| 3    | 158-300         |
| 4    | 301-357         |
| 5    | 358-438         |
| 6    | 439-514         |
| 7    | 515-577         |
| 8    | 578-719         |
| 9    | 720-776         |
| 10   | 777-861         |

*Exon*    2   3   4    5   6   7                      8    9

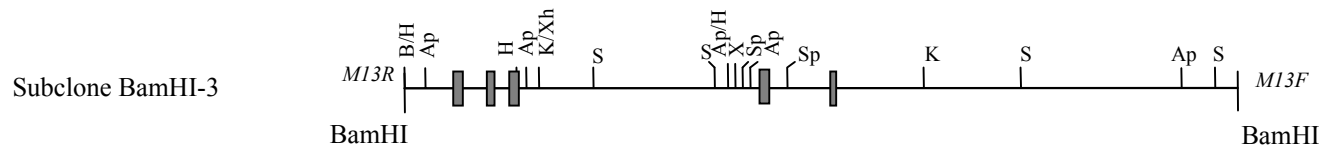

1 kb

**Supplementary Figure 1. Vector construction strategy.** A plasmid contig of 22.7 kb was constructed from the three subclones XhoI-3, HindIII-2, and BamHI-3. Subclones HindII-2 and BamHI-3 were used to construct the *Hip1r* targeting vector. Mouse nucleotide numbers are based on NCI accession # AF221713. K=KpnI; Ap=ApaI; B=BamHI; E=EcoRI; Rv=EcoRV; H=HindIII; S=SacI; Sp=SpeI; X=XbaI; Xh=XhoI.
