# Supplementary material
Source: PubMed Central journal article supplement (PMC400480)
Supplement: molcellb_24_10_4329__2.pdf [file molcellb_24_10_4329__2.pdf]

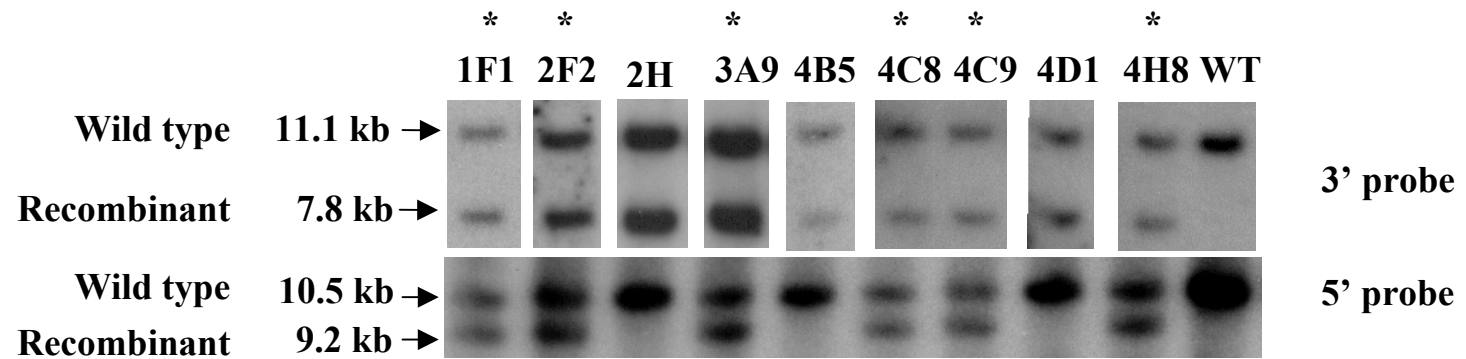

**Supplementary Figure 2. Southern blots of genomic DNA from embryonic stem cell clones.** Each clone was digested with *Bam*HI and hybridized using the 3' probe results in a 11.1 kb fragment for the wild type allele and a 7.8 kb band for the targeted allele (top panel). Positive clones were digested with *Bam*HI and hybridized using the 5' Southern blot probe (bottom panel). Wild type and targeted alleles result in 10.5 kb and 9.2 kb fragments, respectively. Six ES clones were correctly targeted (\*).
